# Supplementary material
Source: MDPI journal article supplement (https://www.mdpi.com/1424-2818/14/5/331)
Supplement: s1 [file s1 › diversity-1657937-supplementary.pdf]

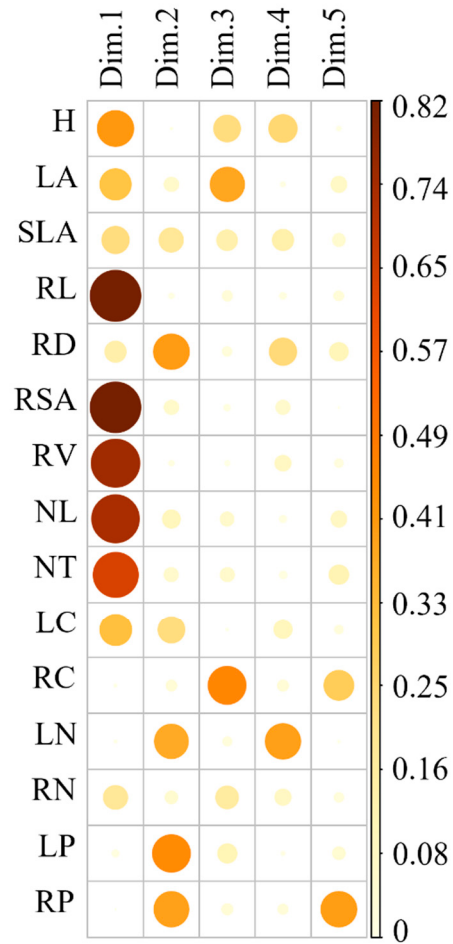

**Figure S1.** Quality of representation of *Carex thunbergii*. The larger the value, the greater the contribution of the variable to the PCA result. H, plant height; SLA, specific leaf area; LA, leaf area; RL, root length; RSA, root surface area; RV, root volume; RD, root diameter; NT, numbers of tips; NL, numbers of links; LC, leaf carbon concentration; LN, leaf nitrogen concentration; LP, leaf phosphorus concentration; RC, root carbon concentration; RN, root nitrogen concentration; RP, root phosphorus concentration.
